# Supplementary material for: Improved sensing performance from methionine capped CdTe and CdTe/ZnS quantum dots for the detection of trace amounts of explosive chemicals in liquid media
Source: Royal Society of Chemistry journal article supplement (doi:10.1039/c2ay26199e), 2012-11-20
Supplement: c2ay26199e.pdf [file c2ay26199e.pdf]

## Supplementary Information

# Improved Sensing from Methionine Capped CdTe and CdTe/ZnS Quantum Dots for the Detection of Trace Amount of Explosive Chemicals (DNT, NB and NT) in Liquid Medium

T. Pazhanivel<sup>a,b</sup>, D. Nataraj<sup>\*a,b</sup>, V. P. Devarajan<sup>a</sup>, V. Mageshwari<sup>a</sup>, K. Senthil<sup>c</sup>, D. Soundararajan<sup>d</sup>

<sup>a</sup>Thinfilms&Nanomaterials Research Laboratory, Department of Physics, Bharathiar University, Coimbatore, India. Fax: 91-422-2422387; Tel: 0422-2428444;

\*corresponding author

E-mail: [de.natraj2011@gmail.com](mailto:de.natraj2011@gmail.com)

<sup>b</sup>DRDO-BU Centre for Life Sciences, Bharathiar University Campus, Coimbatore, India.

<sup>c</sup>School of Advanced Materials Science & Engineering, Sungkyunkwan University (Suwon Campus), Cheoncheon-dong 300, Jangan-gu, Suwon 440-746, South Korea

<sup>d</sup>Department of Physics, Yeungnam University, Gyeongsan 712-749, Korea.

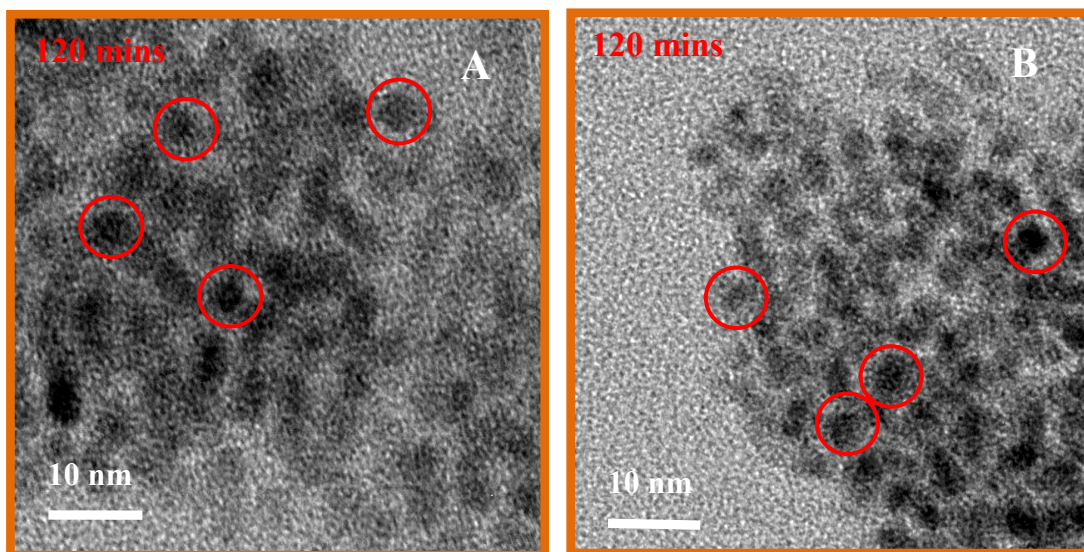

**Figure S1.** Shows the HRTEM image of (A)Methionine and (B) L-Cysteine capped CdTe QDs.

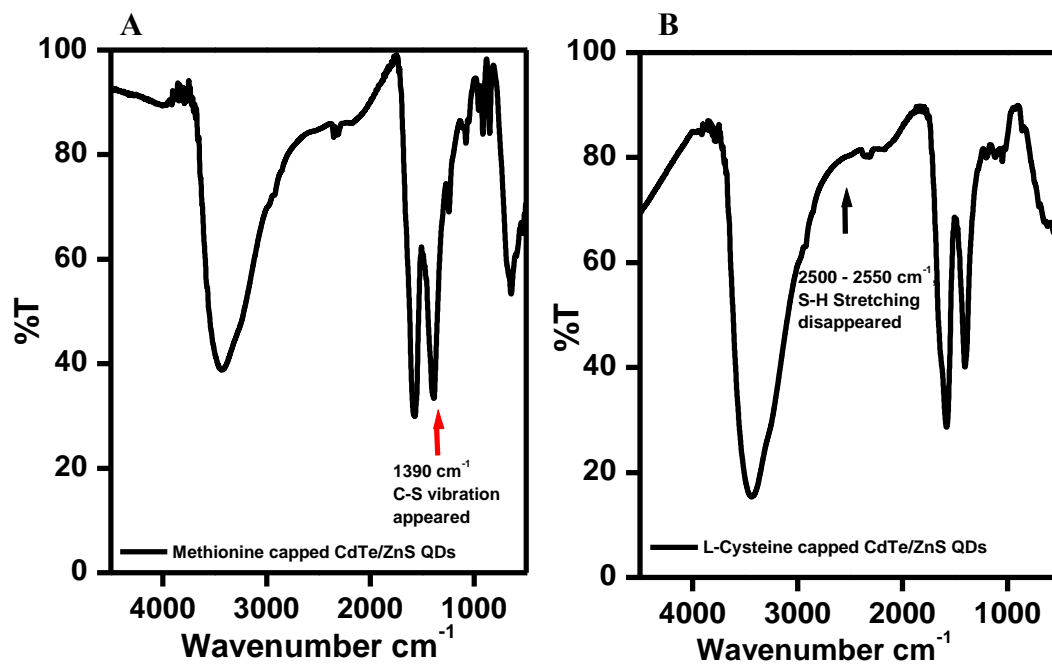

**Figure S2.** Shows the FTIR spectrum for core/shell QDs capped with (A) Methionine and (B) L – Cysteine.

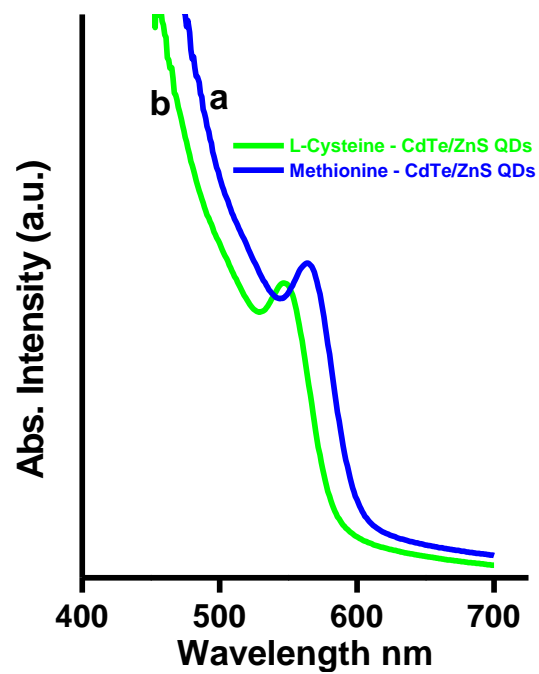

**Figure S3.** Shows the absorption spectrum for (a) Methionine capped; (b) L-cysteine capped CdTe/ZnS core/shell QDs.

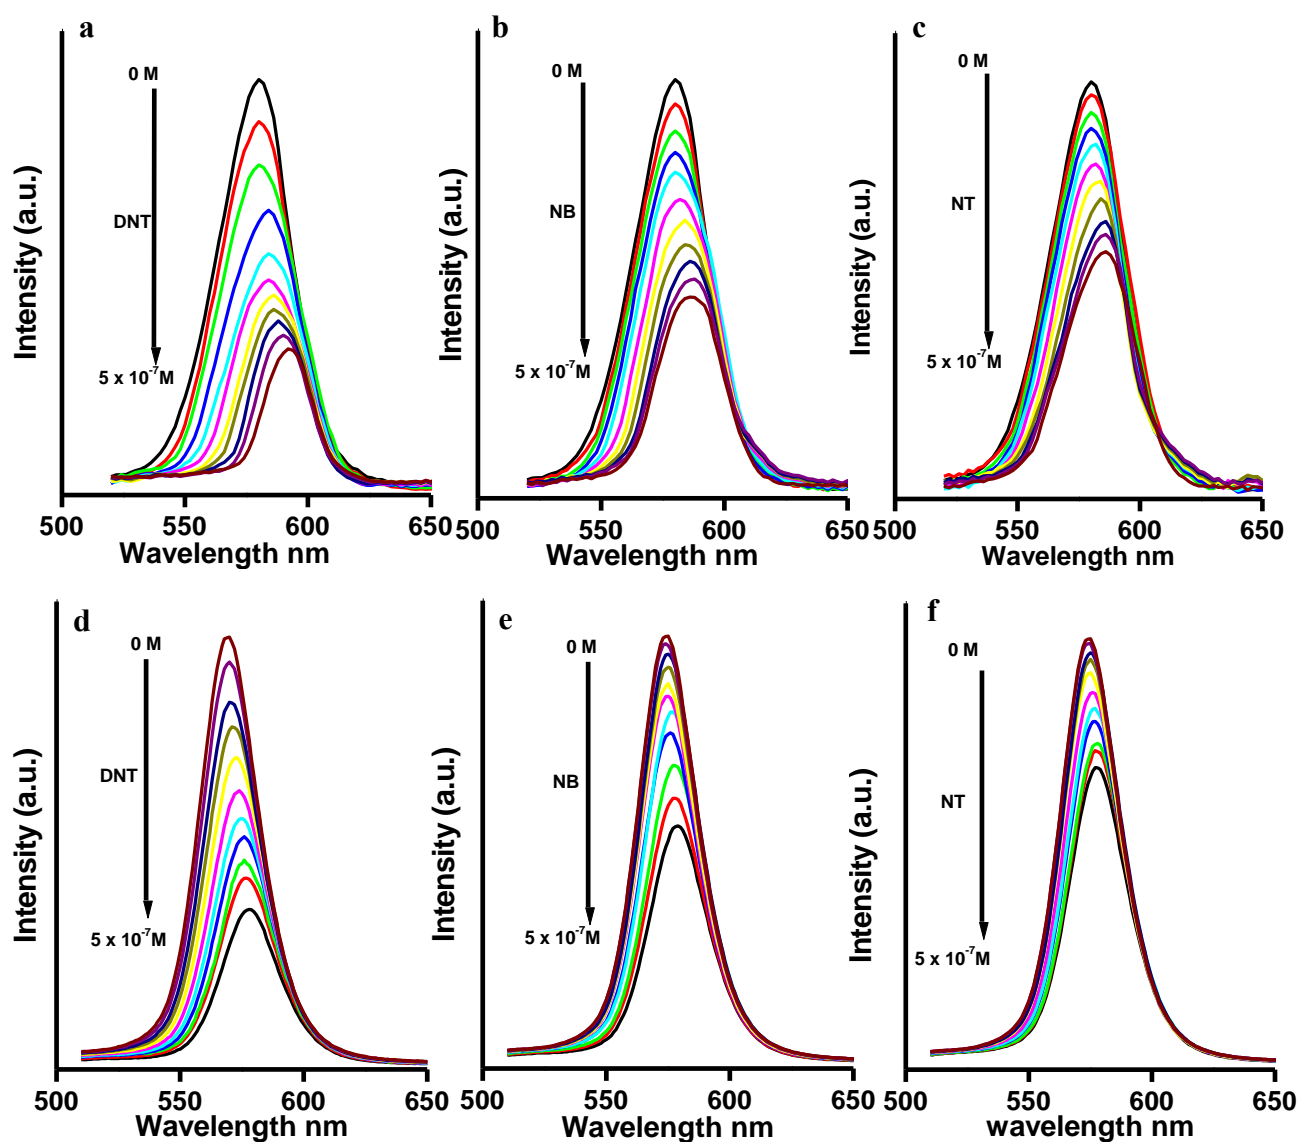

**Figure S4.** Fluorescence quenching spectrum of (a-c) Methionine capped core/shell QDs and (d-f) L-Cysteine capped core/shell QDs in DNT, NB and NT explosives respectively. The analytes concentration varies from top to bottom are 0,  $0.5 \times 10^{-7}$ ,  $1 \times 10^{-7}$ ,  $1.5 \times 10^{-7}$ ,  $2 \times 10^{-7}$ ,  $2.5 \times 10^{-7}$ ,  $3 \times 10^{-7}$ ,  $3.5 \times 10^{-7}$ ,  $4 \times 10^{-7}$ ,  $4.5 \times 10^{-7}$  and  $5 \times 10^{-7}$  mol/L respectively.

**Table T1.** Average Lifetime values for Methionine and L-Cysteine capped CdTe and CdTe/ZnS core/shell QDs with different concentrations of DNT, NB and NT analytes.

|                  |                                   | <b>Core/shell average lifetime x 10<sup>-9</sup> S</b> |                                       |
|------------------|-----------------------------------|--------------------------------------------------------|---------------------------------------|
| <i>Explosive</i> | <i>Concentration of explosive</i> | <i>Methionine capped CdTe/ZnS QDs</i>                  | <i>L-Cysteine capped CdTe/ZnS QDs</i> |
| <b>DNT</b>       | <b>0 M</b>                        | <b>23.99</b>                                           | <b>22.83</b>                          |
|                  | <b>2 M</b>                        | <b>16.77</b>                                           | <b>17.21</b>                          |
|                  | <b>4 M</b>                        | <b>9.08</b>                                            | <b>12.18</b>                          |
| <b>NB</b>        | <b>2 M</b>                        | <b>17.20</b>                                           | <b>19.36</b>                          |
|                  | <b>4 M</b>                        | <b>12.13</b>                                           | <b>15.23</b>                          |
| <b>NT</b>        | <b>2 M</b>                        | <b>17.93</b>                                           | <b>20.67</b>                          |
|                  | <b>4 M</b>                        | <b>16.14</b>                                           | <b>16.42</b>                          |
|                  |                                   | <b>Bare average lifetime x 10<sup>-9</sup> S</b>       |                                       |
|                  |                                   | <i>Methionine capped CdTe QDs</i>                      | <i>L-Cysteine capped CdTe QDs</i>     |
| <b>DNT</b>       | <b>0 M</b>                        | <b>7.33</b>                                            | <b>7.19</b>                           |
|                  | <b>10 M</b>                       | <b>5.50</b>                                            | <b>6.70</b>                           |
|                  | <b>20 M</b>                       | <b>5.02</b>                                            | <b>6.18</b>                           |
| <b>NB</b>        | <b>10 M</b>                       | <b>5.93</b>                                            | <b>6.88</b>                           |
|                  | <b>20 M</b>                       | <b>5.71</b>                                            | <b>6.62</b>                           |
| <b>NT</b>        | <b>10 M</b>                       | <b>6.50</b>                                            | <b>7.17</b>                           |
|                  | <b>20 M</b>                       | <b>5.84</b>                                            | <b>6.82</b>                           |

**Table T2.** Charge transfer rate for Methionine and L-Cysteine capped CdTe and CdTe/ZnS core/shell QDs with different concentrations of DNT, NB and NT analytes.

| <i>Explosive</i> | <i>Concentration of explosive</i> | <b>Core/shell Charge Transfer Rate x 10<sup>7</sup> S<sup>-1</sup></b> |                                       |
|------------------|-----------------------------------|------------------------------------------------------------------------|---------------------------------------|
|                  |                                   | <i>Methionine capped CdTe/ZnS QDs</i>                                  | <i>L-Cysteine capped CdTe/ZnS QDs</i> |
| <b>DNT</b>       | <b>2 M</b>                        | <b>1.79</b>                                                            | <b>1.42</b>                           |
|                  | <b>4 M</b>                        | <b>6.83</b>                                                            | <b>3.82</b>                           |
| <b>NB</b>        | <b>2 M</b>                        | <b>1.64</b>                                                            | <b>0.78</b>                           |
|                  | <b>4 M</b>                        | <b>4.07</b>                                                            | <b>2.18</b>                           |
| <b>NT</b>        | <b>2 M</b>                        | <b>1.40</b>                                                            | <b>0.45</b>                           |
|                  | <b>4 M</b>                        | <b>2.02</b>                                                            | <b>1.70</b>                           |
|                  |                                   | <b>bare Charge Transfer Rate x 10<sup>7</sup> S<sup>-1</sup></b>       |                                       |
|                  |                                   | <i>Methionine capped CdTe QDs</i>                                      | <i>L-Cysteine capped CdTe QDs</i>     |
| <b>DNT</b>       | <b>10 M</b>                       | <b>4.54</b>                                                            | <b>1.00</b>                           |
|                  | <b>20 M</b>                       | <b>6.26</b>                                                            | <b>2.26</b>                           |
| <b>NB</b>        | <b>10 M</b>                       | <b>3.22</b>                                                            | <b>0.60</b>                           |
|                  | <b>20 M</b>                       | <b>3.85</b>                                                            | <b>1.17</b>                           |
| <b>NT</b>        | <b>10 M</b>                       | <b>1.74</b>                                                            | <b>0.02</b>                           |
|                  | <b>20 M</b>                       | <b>3.47</b>                                                            | <b>0.74</b>                           |
